# Supplementary material for: Activin-A impairs CD8 T cell-mediated immunity and immune checkpoint therapy response in melanoma
Source: HighWire-hosted journal article supplement (doi:10.1136/jitc-2022-004533), 2022-05-01
Supplement: jitc-2022-004533supp002_data_supplement.pdf [file jitc-2022-004533supp002_data_supplement.pdf]

# Activin-A impairs CD8 T cell-mediated immunity and immune checkpoint therapy response in melanoma

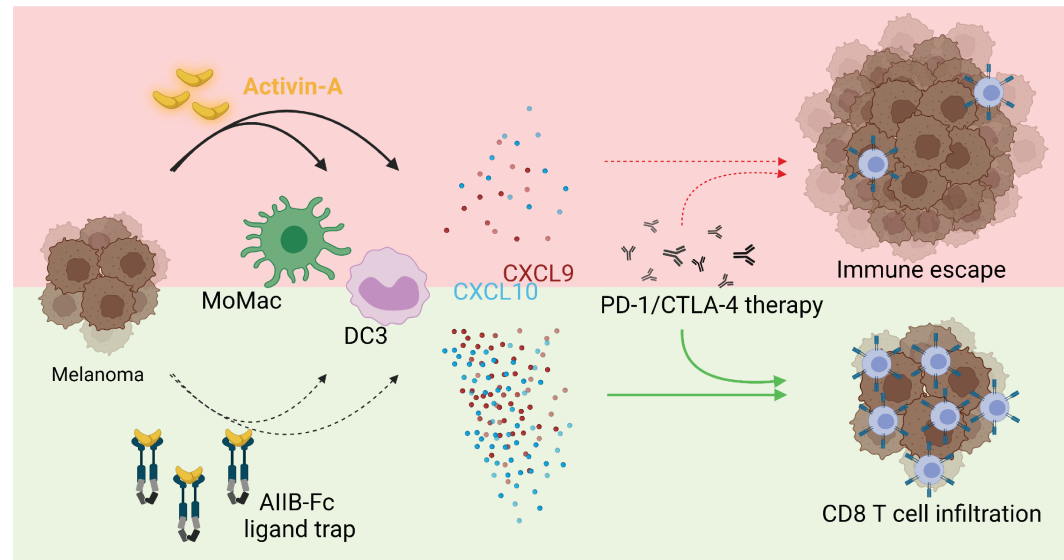

## Authors

Katarina Pinjusic, Olivier A. Dubey, Olga Egorova, Sina Nassiri, Etienne Meylan, Julien Faget, and Daniel B. Constan

## Correspondence

daniel.constam@epfl.ch

## In Brief

Activin-A promotes immunotherapy resistance and tumor immune evasion by indirectly inhibiting CTL accumulation and function. Thus, Activin-A inhibition holds promise to boost anti-tumor immunity and immunotherapy.
